# Supplementary material
Source: publisher figshare collection journal article supplement (https://geolsoc.figshare.com/ndownloader/files/14358590)
Supplement: Supplementary file 1 [file 14358590]

## Sheet: Sheet1
Table S22 Sandstone chemistry ch. 10 Basalt clasts ICP-MS
Basalt clasts XRF
Sample name	N13 397	N13 398		N14 205		N14 202	N14-215		N14-223		N13 90	N13 91	N13 93	N14 83
Rock type	Basalt clast	Basalt clast		Basalt clast		Basalt clast	Basalt clast		Basalt clast		Basalt clast	Basalt clast	Basalt clast	Basalt clast
Region	Ned's Creek, Nelson area, Stephens Subgroup	Ned's Creek, Nelson area, Stephens Subgroup		Wai-iti River, Richmond area, Stephens Subgroup		Conglomerate Creek, Richmond area, Murihiku Terrane	Champion Road, Richmon area, Murihiku Terrane		Wairoa River, Richmond area, Murihiku Terrane		Mossburn quarry, southland, Stephens Subgroup	Mossburn quarry, southland, Stephens Subgroup	Mossburn quarry, southland, Stephens Subgroup	Mossburn quarry, southland, Stephens Subgroup
GPS	N.A.	N.A.		N.A.		E25 14878 N59 72969	E25 28966 N59 84483		E25 21062 N59 78732		S45 65559 E168 22954	S45 65559 E168 22954	S45 65559 E168 22954	S45 65559 E168 22954
Ba	246	104		373		419	191		641		354	226	89	68
Be	2	3		6		2	2		4		<1	<1	<1	2
Co	23.4	35.2		23.6		31	112		22.9		24.2	60	28.7	81.6
Cs	2.9	1.5		1.2		4.4	2.5		1		10.3	1.2	1	1.1
Ga	17.8	13.8		16.9		24.6	16.6		13.5		21.7	12	24	16
Hf	3.5	2.3		9.3		3.6	1.4		8.2		3.8	1.8	2.7	1.8
Nb	4.6	2.2		9.7		4.2	0.7		10.9		5.9	3.3	3.5	1.1
Rb	51.7	36.4		73.3		57.3	27.7		78.6		183.7	33	4.5	42.1
Sn	2	<1		2		1	<1		1		2	<1	<1	<1
Sr	217.3	206.7		131.1		281.1	259.5		183.3		84.4	496.7	191.7	450.2
Ta	1.6	1		4.4		0.5	2.3		6.1		2.3	2.4	0.7	2.1
Th	4.5	0.2		8.1		2.6	0.2		9.7		8.1	0.8	2.5	<0.2
U	1.4	0.4		3		1	<0.1		2.8		1.8	0.2	0.9	<0.1
V	162	209		23		242	267		21		121	353	206	328
W	106	58.7		425.9		6	233.6		504		116.6	117.5	46.4	154.7
Zr	124.8	79.3		346.3		128.4	51		324.4		128.5	66.5	112.8	72.5
Y	23.1	15.2		35.9		24.2	20.7		29.5		16	19.7	18.5	25.7
La	15	1.1		19.3		10.7	3.1		22.3		18.2	6.7	12.1	2.7
Ce	31.6	3.3		46.1		27.6	7.7		51.9		41	16	27.2	8.1
Pr	3.96	0.55		5.93		3.78	1.4		6.51		4.27	2.14	3.36	1.37
Nd	18.2	3.3		24.6		16.7	7.1		27.3		17.2	10.3	15.1	7.3
Sm	3.48	1.71		5.59		4.25	2.37		5.66		3.93	3	3.32	2.52
Eu	0.95	0.52		1.26		1.16	0.91		1.19		0.84	0.87	1.12	0.98
Gd	3.78	2.14		6.07		4.77	3.36		5.35		3.29	3.66	3.67	3.75
Tb	0.66	0.45		1.04		0.79	0.54		0.82		0.58	0.58	0.57	0.7
Dy	4.17	3.17		6.43		4.8	3.68		5.03		3.35	3.7	3.6	4.6
Ho	0.84	0.6		1.31		0.93	0.7		1.03		0.68	0.8	0.71	0.98
Er	2.3	2		4.11		2.82	2.18		3.32		2.13	2.17	2	3.07
Tm	0.34	0.25		0.66		0.43	0.32		0.49		0.32	0.32	0.31	0.45
Yb	2.3	1.97		4.29		2.81	2.13		3.3		2.19	2.24	2.14	2.83
Lu	0.34	0.23		0.69		0.44	0.34		0.53		0.34	0.34	0.31	0.45
